# Supplementary material
Source: PubMed Central journal article supplement (PMC6641342)
Supplement: ao7b01340_si_001.pdf [file ao7b01340_si_001.pdf]

## Supporting Information

# Sn-Doped Rutile TiO<sub>2</sub> Hollow Nanocrystals with Enhanced Lithium-Ion Batteries Performance

*Shilong Jiao,<sup>†,//</sup> Gang Lian,<sup>\*†,□,//</sup> Laiying Jing,<sup>†</sup> Zhenghao Xu,<sup>†</sup> Qilong Wang,<sup>‡</sup>  
Deliang Cui,<sup>\*†</sup> and Ching-Ping Wong,<sup>\*□</sup>*

<sup>†</sup> State Key Lab of Crystal Materials, Shandong University, Jinan 250100, P. R. China

<sup>‡</sup> Key Laboratory for Special Functional Aggregated Materials of Education Ministry,  
School of Chemistry & Chemical Engineering, Shandong University, Jinan 250100,  
P. R. China

<sup>□</sup> School of Materials Science and Engineering, Georgia Institute of Technology,  
Atlanta, Georgia 30332, United State

E-mail: liangang@sdu.edu.cn, cuidl@sdu.edu.cn, cpwong@cuhk.edu.hk

### Supporting Information Contents

-Figures S1.-S14.

-Supporting Information Table S1. and Table S2.

-References

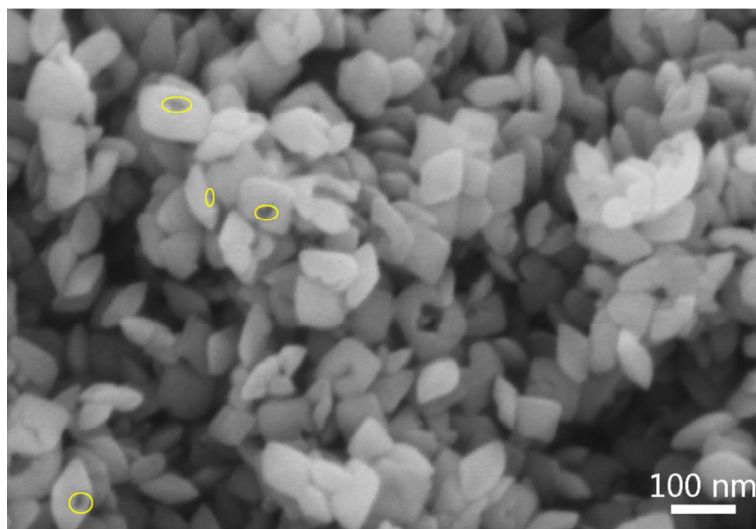

**Figure S1.** SEM image of the as-obtained Sn-doped rutile TiO<sub>2</sub> hollow nanocrystals.

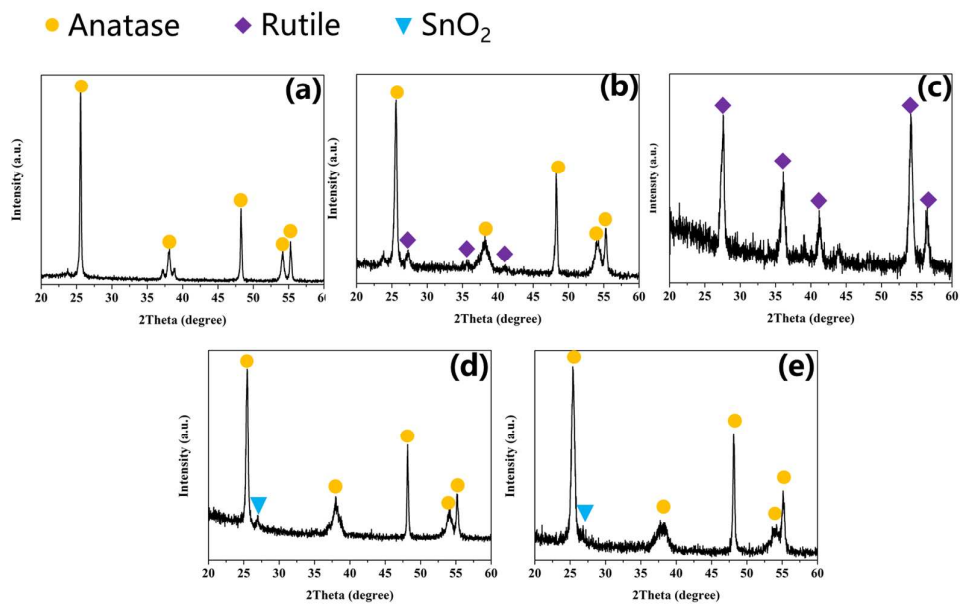

**Figure S2.** XRD patterns of the as-obtained TiO<sub>2</sub> synthesized with (a) 0 mmol, (b) 2 mmol, (c) 4 mmol, (d) 6 mmol and (e) 8 mmol SnCl<sub>4</sub>·5H<sub>2</sub>O.

● Anatase TiO<sub>2</sub>

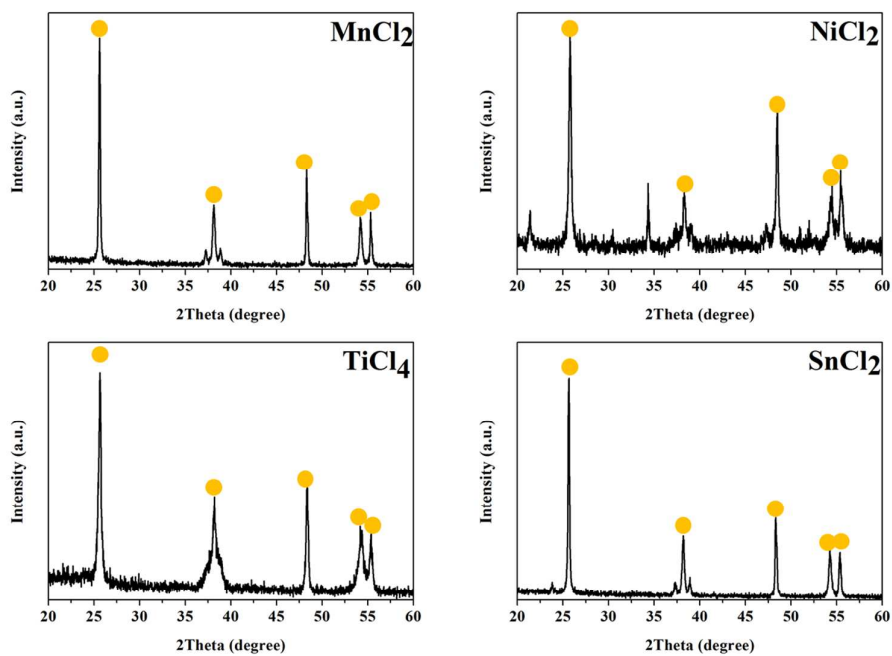

**Figure S1.** The XRD patterns of the products synthesized with other metal chlorides while keeping the molar amount of Cl<sup>-</sup> same with the SnCl<sub>4</sub> reaction system.

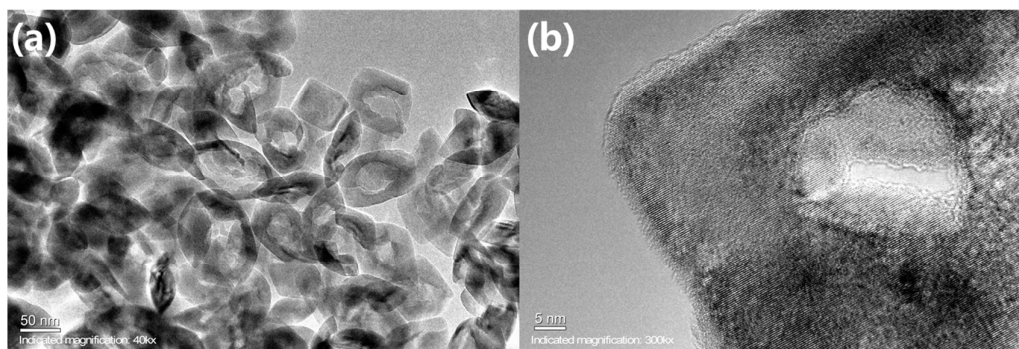

**Figure S4.** (a) TEM and (b) HRTEM images of the as-obtained Sn-doped rutile  $\text{TiO}_2$  hollow nanocrystals.

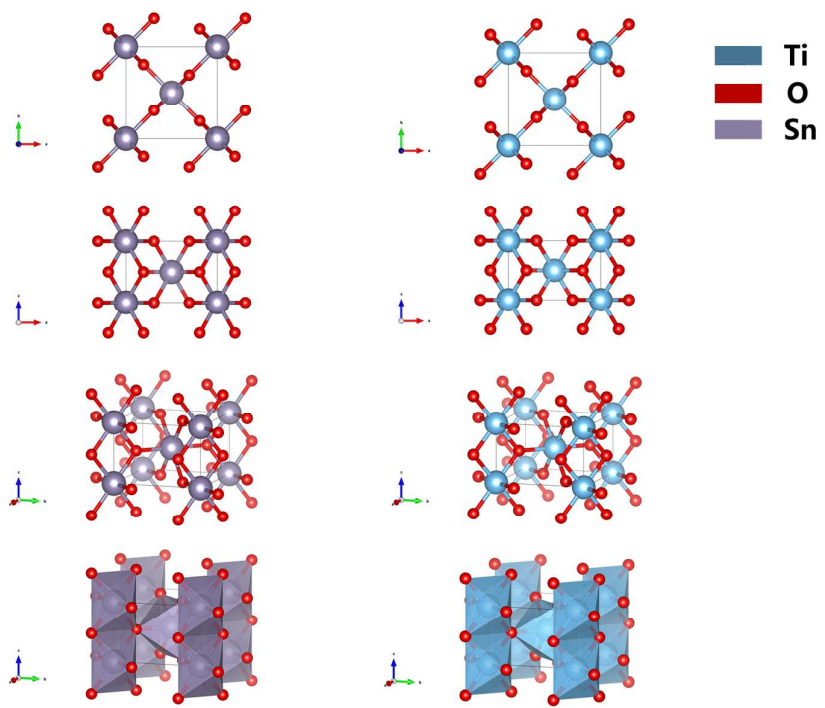

**Figure S5.** Schematic illustrations of SnO<sub>2</sub> and rutile TiO<sub>2</sub>.

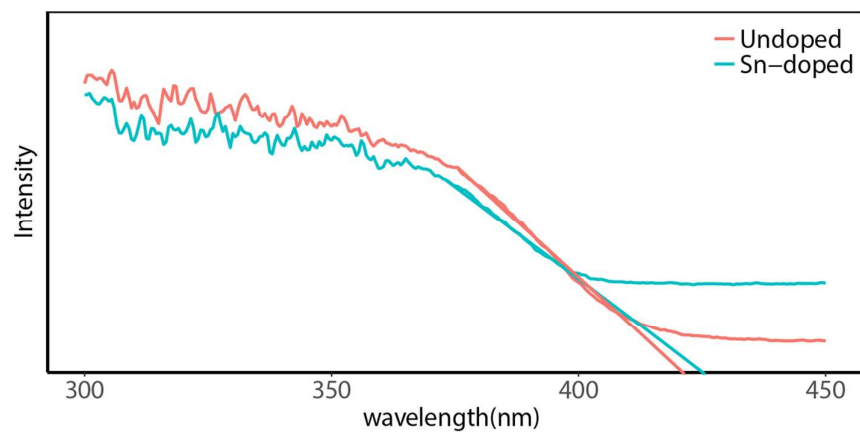

**Figure S6.** UV-vis spectra of the Sn-doped rutile TiO<sub>2</sub> hollow nanocrystals and the un-doped rutile TiO<sub>2</sub>. The calculated band gap of Sn-doped TiO<sub>2</sub> is ~2.9 eV, which is slightly lower than the pure rutile TiO<sub>2</sub>. DFT-based theoretical calculations shows that the doping of tin acts as the main reason for the decrease of the bandgap.

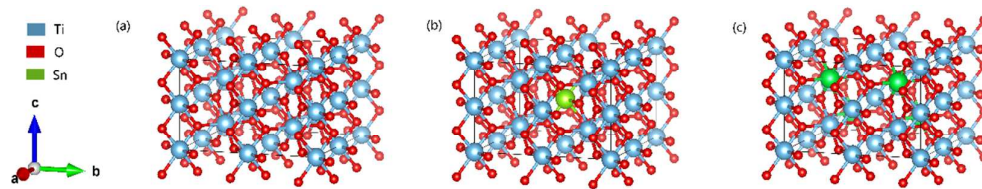

**Figure S7.** Schematic illustration of initial structures for the Sn-doped rutile TiO<sub>2</sub> with different doping amount. (a) pure rutile TiO<sub>2</sub>, (b) 6.25% Sn-doped rutile TiO<sub>2</sub>, (c) 25% Sn-doped rutile TiO<sub>2</sub>.

DFT-based (density functional theory) simulation was run using Dmol<sup>3</sup> package in the Materials Studio Software. A 2\*2\*2 supercell was created by replication of the elementary cell in the x, y, z directions. Generalized gradient approximation (GGA) functional proposed by Perdew–Burke–Ernzerhof<sup>1–3</sup>(PBE) was used. DSPP (DFT Semi-core Pseudopotential) was used to describe the electron and core interaction. A global cutoff of 5 Å was used which is the same setting for all the models.



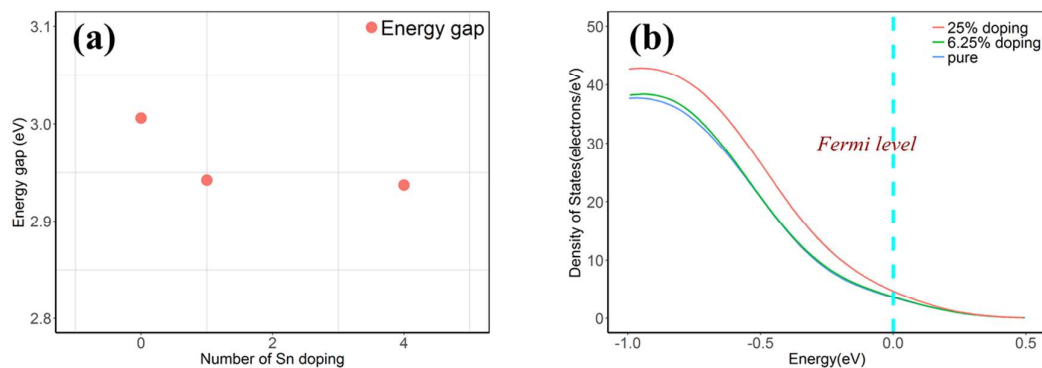

**Figure S8.** (a) Relationship between the energy gap and the number of Sn doping. (b) DOS spectra of the three different systems.

The calculated bandgaps were 3.006 eV for pure rutile  $\text{TiO}_2$ , 2.942 eV for 6.25% Sn-doped rutile  $\text{TiO}_2$ , and 2.937 eV for 25% Sn-doped rutile  $\text{TiO}_2$ . The results indicate that the bandgap narrows with increasing the amount of Sn in rutile  $\text{TiO}_2$ . Further analysis of the electron states distribution shows that the density of states near the Fermi level increases with the amount of Sn, which is beneficial for the photo-related catalysis or energy transformation process.

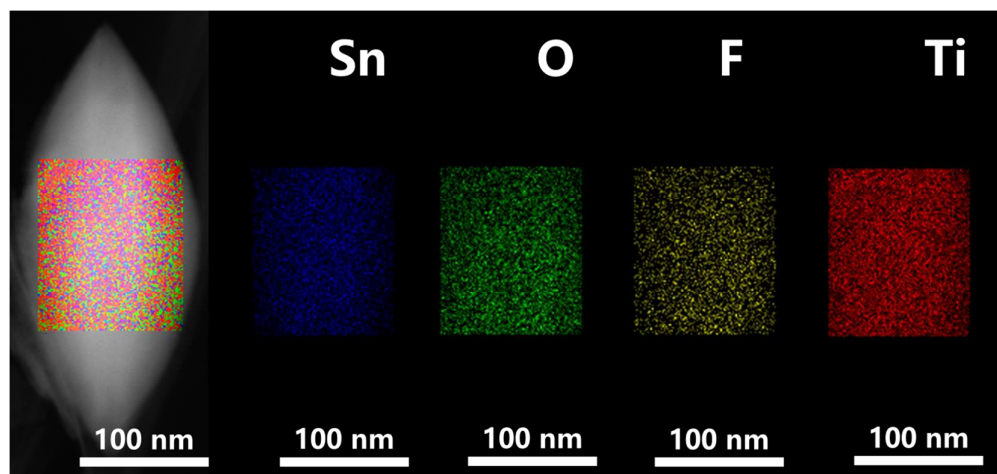

**Figure S9** STEM image of single Sn-doped TiOF<sub>2</sub> nanocrystal and EDS mappings of Sn, O, F and Ti elements.

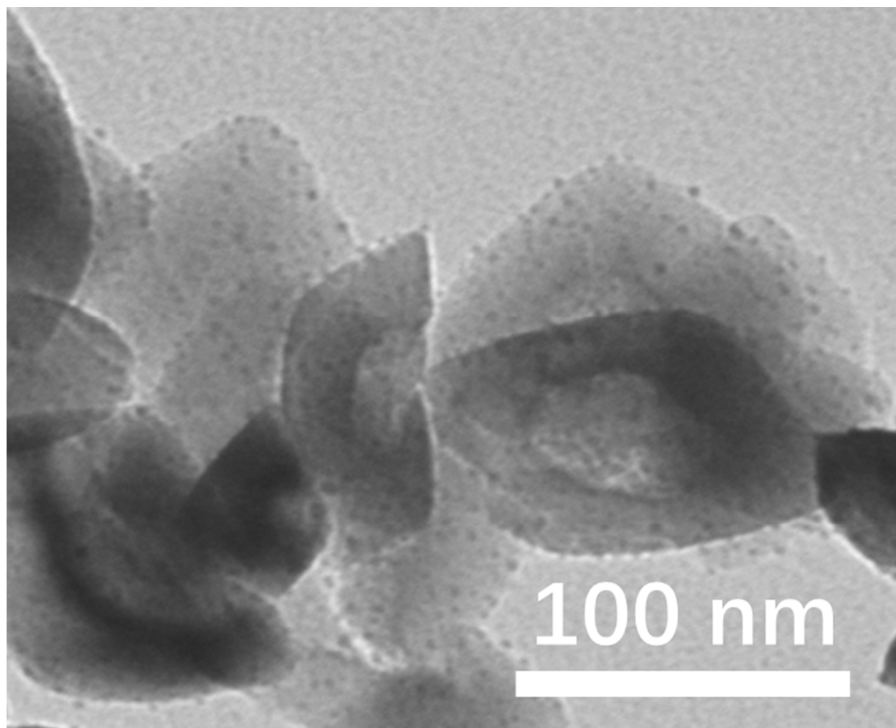

**Figure S10.** TEM image of the rutile Sn-doped  $\text{TiO}_2$  nanocrystals on the surfaces of solid Sn-doped  $\text{TiOF}_2$ .

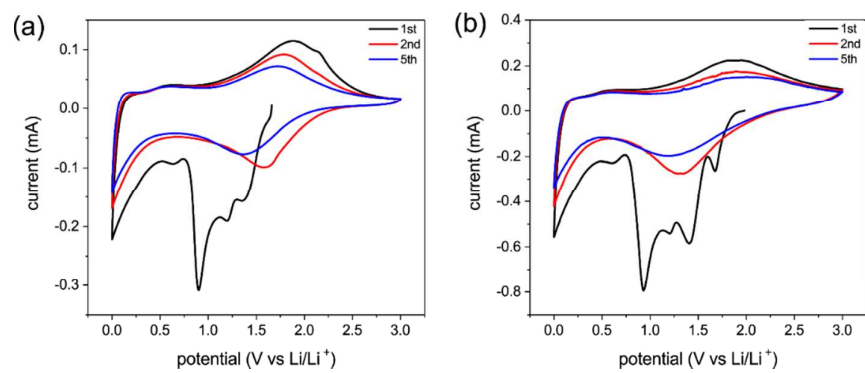

**Figure S11.** CV profiles of (a) un-annealed and (b) annealed Sn-doped rutile  $\text{TiO}_2$  hollow nanocrystals showing the 1st, 2nd and 5th cycles between 0.01 and 3.0 V at a scan rate of  $0.2 \text{ mV s}^{-1}$ .

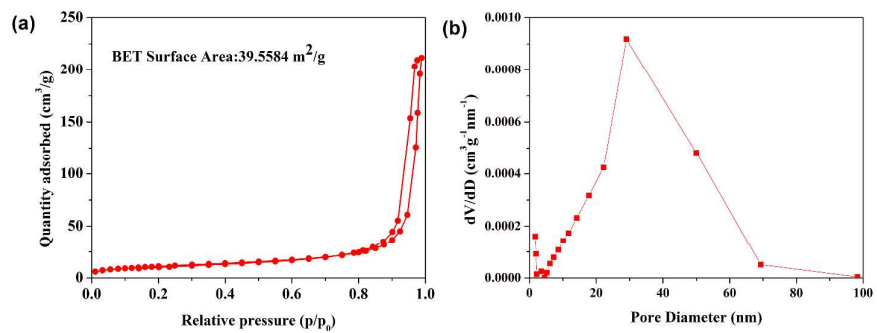

**Figure S12** (a) The nitrogen adsorption/desorption isotherms and (b) the pore size distribution curves of the Sn-doped rutile TiO<sub>2</sub> nanocrystals. The BET specific surface area and BJH pore volume are 39.5584 m<sup>2</sup>/g and 0.32852 cm<sup>3</sup>/g .

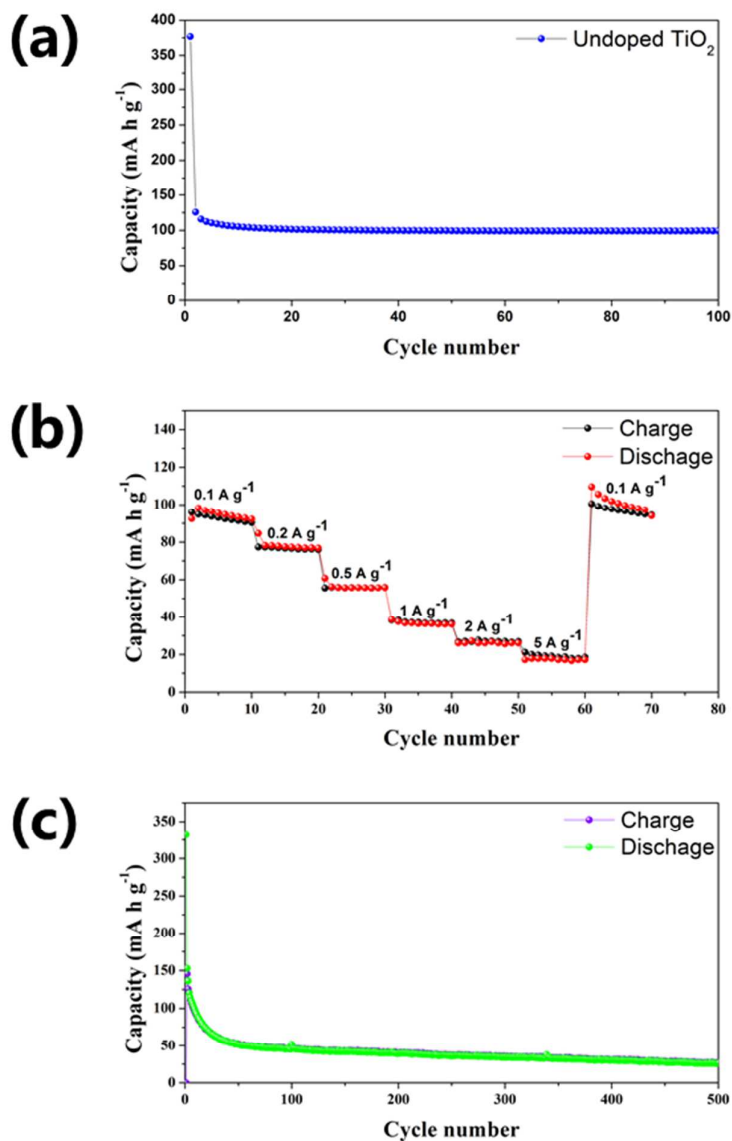

**Figure S13.** (a) Cycle performance at 100 mA g<sup>-1</sup> in the 0.01-3 V range of the un-doped TiO<sub>2</sub>; (b) Rate capabilities of the un-doped TiO<sub>2</sub> at a current density ranging from 100-5000 mA h g<sup>-1</sup>; (c) The cycling performance of annealed Sn-doped rutile TiO<sub>2</sub> at the rate of 1000 mA h g<sup>-1</sup>.

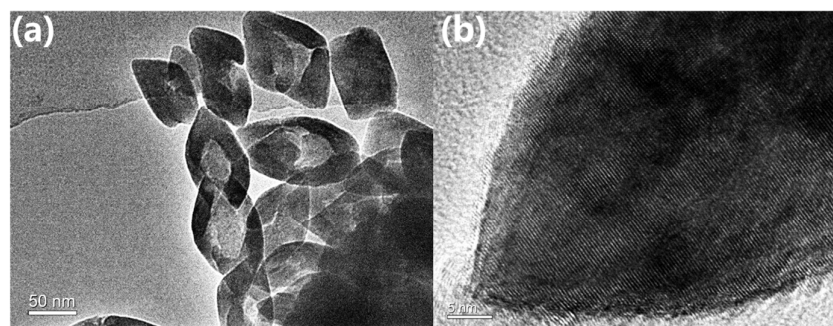

**Figure S14** TEM (a) and HRTEM (b) images of the Sn-doped rutile TiO<sub>2</sub> after cycle performance test (1 A g<sup>-1</sup>, 100 cycles).

**Table S1.** Comparison of the lattice parameters of rutile SnO<sub>2</sub> and TiO<sub>2</sub>.

| <b>Material</b> | <b>Rutile SnO<sub>2</sub></b> | <b>Rutile TiO<sub>2</sub></b> |
|-----------------|-------------------------------|-------------------------------|
| a (Å)           | 4.73730                       | 4.59400                       |
| b (Å)           | 4.73730                       | 4.59400                       |
| c (Å)           | 3.18640                       | 2.95900                       |
| $\alpha$        | 90                            | 90                            |
| $\beta$         | 90                            | 90                            |
| $\gamma$        | 90                            | 90                            |
| Space Group     | P42/mnm                       | P42/mnm                       |



**Table S2.** Comparison of the electrochemical performances of the as-prepared Sn-doped rutile TiO<sub>2</sub> with the reported performances of rutile TiO<sub>2</sub> as anode materials in the LIBs.

| Materials                                             | Current rate                     | Reversible capacity (mA h g <sup>-1</sup> ) | Current rate | Reversible capacity (mA h g <sup>-1</sup> ) |
|-------------------------------------------------------|----------------------------------|---------------------------------------------|--------------|---------------------------------------------|
| TiO <sub>2</sub> submicroboxes <sup>4</sup>           | 30 C                             | 68                                          | 1C           | 210                                         |
| Dark TiO <sub>2</sub> nanorod <sup>5</sup>            | 50 C                             | 93.6                                        | 1 C          | 166.7                                       |
| TiO <sub>2</sub> mesocrystals <sup>6</sup>            | 5 C                              | 100                                         | 1 C          | 171.3                                       |
| Nanosized TiO <sub>2</sub> <sup>7</sup>               | 30 C                             | 70                                          | 1 C          | 132                                         |
| TiO <sub>2</sub> microspheres <sup>8</sup>            | 10 C                             | 106                                         | 1 C          | 160.4                                       |
| B-doped TiO <sub>2</sub> <sup>9</sup>                 | 10 C                             | 72                                          | 1 C          | 154                                         |
| <b>Sn-doped TiO<sub>2</sub> structure (This work)</b> | <b>rutile hollow (This work)</b> | <b>5000 mA g<sup>-1</sup> (30C)</b>         | <b>110</b>   | <b>100 mA g<sup>-1</sup> (~0.6 C)</b>       |

## References

- (1) Perdew, J. P.; Wang, Y.; Pair-distribution function and its coupling-constant average for the spin-polarized electron gas. *Phys. Rev. B* **1992**, *46* (20), 947–954.
- (2) Perdew, J. P. Density-Functional Approximation for the Correlation Energy of the Inhomogeneous Electron Gas. *Phys. Rev. B* **1986**, *33* (12), 8822–8824.
- (3) Perdew, J. P.; Burke, K.; Ernzerhof, M. Generalized Gradient Approximation Made Simple. *Phys. Rev. Lett.* **1996**, *77* (18), 3865–3868.
- (4) Yu, X.-Y.; Wu, H. Bin; Yu, L.; Ma, F.-X.; Lou, X. W. D. Rutile TiO<sub>2</sub> Submicroboxes with Superior Lithium Storage Properties. *Angew. Chemie Int. Ed.* **2015**, *54* (13), 4001–4004.
- (5) Chen, J.; Song, W.; Hou, H.; Zhang, Y.; Jing, M.; Jia, X.; Ji, X. Ti<sup>3+</sup> Self-Doped Dark Rutile TiO<sub>2</sub> Ultrafine Nanorods with Durable High-Rate Capability for Lithium-Ion Batteries. *Adv. Funct. Mater.* **2015**, 6793–6801.
- (6) Hong, Z.; Wei, M.; Lan, T.; Jiang, L.; Cao, G. Additive-Free Synthesis of Unique TiO<sub>2</sub> Mesocrystals with Enhanced Lithium-Ion Intercalation Properties. *Energy Environ. Sci.* **2012**, *5* (1), 5408.
- (7) Hu, Y. S.; Kienle, L.; Guo, Y. G.; Maier, J. High Lithium Electroactivity of Nanometer-Sized Rutile TiO<sub>2</sub>. *Adv. Mater.* **2006**, *18* (11), 1421–1426.

- (8) Lan, T.; Liu, Y.; Dou, J.; Hong, Z.; Wei, M. Hierarchically Porous TiO<sub>2</sub> Microspheres as a High Performance Anode for Lithium-Ion Batteries. *J. Mater. Chem. A* **2014**, 2 (4), 1102–1106.
- (9) Tian, H.; Xin, F.; Tan, X.; Han, W. High Lithium Electroactivity of Boron-Doped Hierarchical Rutile Submicrosphere TiO<sub>2</sub>. *J. Mater. Chem. A* **2014**, 2 (27), 10599–10606.
